# Supplementary material
Source: publisher figshare collection journal article supplement (https://acs.figshare.com/ndownloader/files/3860629)
Supplement: Supplementary file 1 [file 3860629]

# Simple and Efficient Separation of Atomically Precise Noble Metal Clusters

Atanu Ghosh,<sup>†,‡</sup> Jukka Hassinen,<sup>§,‡</sup> Petri Pulkkinen,<sup>#</sup> Heikki Tenhu,<sup>#</sup> Robin H. A. Ras<sup>§,\*</sup> and Thalappil Pradeep<sup>†,\*</sup>

<sup>†</sup> DST Unit of Nanoscience (DST UNS) and Thematic Unit of Excellence (TUE), Department of Chemistry, Indian Institute of Technology Madras, Chennai 600 036, India.

<sup>§</sup> Department of Applied Physics, Aalto University (Helsinki University of Technology), Puumiehenkuja 2, FI-02150 Espoo, Finland.

<sup>#</sup> Department of Chemistry, University of Helsinki, P.O. Box 55, 00014 Helsinki, Finland.

<sup>‡</sup> These authors contributed equally.

\* [robin.ras@aalto.fi](mailto:robin.ras@aalto.fi) (fax: +358-9-47023155), [pradeep@iitm.ac.in](mailto:pradeep@iitm.ac.in) (fax: +91-44-2257 0509/0545)

## Content

| # | Description                                                                                                          | Page number |
|---|----------------------------------------------------------------------------------------------------------------------|-------------|
| 1 | <i>Separation of BT and PET Protected Au<sub>25</sub></i>                                                            | S-2         |
| 2 | <i>Oxidation of Au<sub>25</sub>PET<sub>18</sub><sup>-</sup> During a TLC Run</i>                                     | S-3         |
| 3 | <i>TLC Separation of Au<sub>25</sub>PET<sub>18</sub><sup>-</sup> and Au<sub>25</sub>PET<sub>18</sub><sup>0</sup></i> | S-4         |
| 4 | <i>Retention Factors for All Separated Clusters</i>                                                                  | S-5         |
| 5 | <i>Peak Positions and Assigned Compositions of Au<sub>25</sub>Calix<sub>0-3</sub>BT<sub>6-18</sub></i>               | S-6         |
| 6 | <i>Sticking of Clusters to TLC Plate Demonstrated</i>                                                                | S-7         |
| 7 | <i>Monitoring the Progress of a Reaction Using TLC</i>                                                               | S-8         |
| 8 | <i>References</i>                                                                                                    | S-9         |

## 1. Separation of BT and PET Protected Au<sub>25</sub>

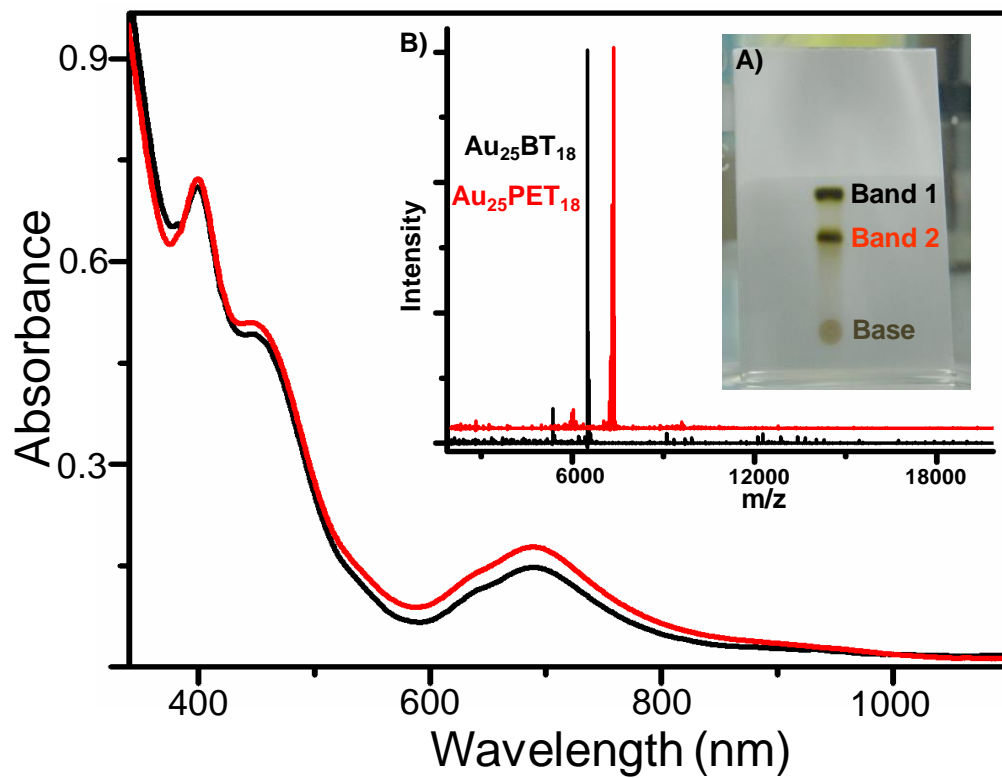

**Figure S-1.** UV-vis spectra of TLC separated materials. A) Photograph of the TLC plate used for cluster separation. Bands 1 and 2 are due to two separated clusters. B) MALDI MS data of TLC separated materials confirming that bands 1 (black trace) and 2 (red trace) are pure Au<sub>25</sub>BT<sub>18</sub> and Au<sub>25</sub>PET<sub>18</sub>, respectively.

## 2. Oxidation of $\text{Au}_{25}\text{PET}_{18}^-$ During a TLC Run

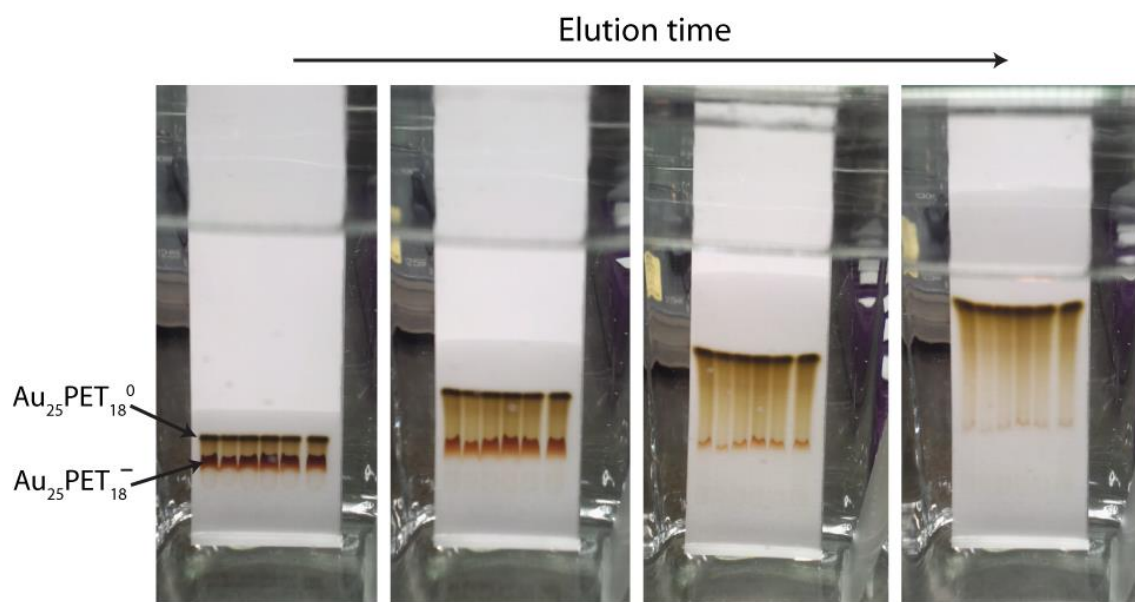

**Figure S-2.** Oxidation of  $\text{Au}_{25}\text{PET}_{18}^-$  to  $\text{Au}_{25}\text{PET}_{18}^0$  during the TLC run (DCM/hexane 60:40). The clusters were spotted directly after the synthesis of  $\text{Au}_{25}\text{PET}_{18}^-$  in order to prevent oxidation during storage. However, we observed the presence of both oxidation states already in the beginning of the TLC run. During elution, the lower band ( $\text{Au}_{25}\text{PET}_{18}^-$ ) gradually converts to  $\text{Au}_{25}\text{PET}_{18}^0$  and causes a tail to the upper band.

### 3. TLC Separation of $\text{Au}_{25}\text{PET}_{18}^-$ and $\text{Au}_{25}\text{PET}_{18}^0$

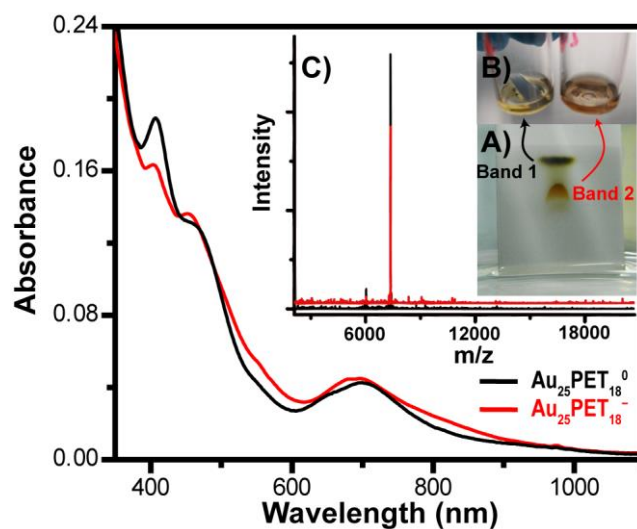

**Figure S-3.** UV-vis spectra of the TLC separated  $\text{Au}_{25}\text{PET}_{18}^0$  and  $\text{Au}_{25}\text{PET}_{18}^-$ . A) Photograph of the TLC plate used for cluster separation (DCM/hexane 70:30). Bands 1 and 2 are due to two separated clusters. B) Photograph of the extracted clusters showing the visible color difference between the two charge states of  $\text{Au}_{25}\text{PET}_{18}$ . C) MALDI MS data of TLC separated materials confirming that bands 1 (black trace) and 2 (red trace) are pure  $\text{Au}_{25}\text{PET}_{18}^0$  and  $\text{Au}_{25}\text{PET}_{18}^-$ , respectively.

## 4. Retention Factors for All Separated Clusters

**Table S-1. TLC Eluent Compositions and  $R_f$  Values of All Separated Clusters**

| Figure | Eluent<br>(DCM/Hexane) | Separated Clusters*                                      | $R_f$ Value |
|--------|------------------------|----------------------------------------------------------|-------------|
| 1      | 40:60                  | Au <sub>25</sub> HT <sub>18</sub>                        | 0.89        |
|        |                        | Au <sub>25</sub> BT <sub>18</sub>                        | 0.77        |
| 2      | 60:40                  | Au <sub>25</sub> PET <sub>18</sub>                       | 0.65        |
|        |                        | Au <sub>144</sub> PET <sub>60</sub>                      | 0.44        |
| 4      | 30:70                  | Au <sub>25</sub> BT <sub>18</sub>                        | 0.33        |
|        |                        | Au <sub>25</sub> Calix <sub>1</sub> BT <sub>16</sub>     | 0.14        |
|        |                        | Au <sub>25</sub> Calix <sub>1</sub> BT <sub>14</sub>     | 0.09        |
|        |                        | Au <sub>25</sub> Calix <sub>2</sub> BT <sub>10-16</sub>  | 0.04        |
| 5      | 35:65                  | Au <sub>25</sub> Calix <sub>2</sub> BT <sub>12-14</sub>  | 0.19        |
|        |                        | Au <sub>25</sub> Calix <sub>2</sub> BT <sub>10-12</sub>  | 0.11        |
|        |                        | Au <sub>25</sub> Calix <sub>2-4</sub> BT <sub>6-12</sub> | 0.06        |
| S-1    | 60:40                  | Au <sub>25</sub> BT <sub>18</sub>                        | 0.88        |
|        |                        | Au <sub>25</sub> PET <sub>18</sub>                       | 0.62        |
| S-3    | 70:30                  | Au <sub>25</sub> PET <sub>18</sub>                       | 0.73        |
|        |                        | Au <sub>25</sub> PET <sub>18</sub> <sup>-</sup>          | 0.58        |

\* Unless otherwise noted, the clusters have a neutral core charge.

## 5. Peak Positions and Assigned Compositions of Au<sub>25</sub>Calix<sub>0-3</sub>BT<sub>6-18</sub>

**Table S-2. Compositions Observed in MALDI MS of Au<sub>25</sub>Calix<sub>0-3</sub>BT<sub>6-18</sub>: Experimental and Theoretical m/z Values**

| Peak ID | Composition                                          | m/z    |        | Difference* |
|---------|------------------------------------------------------|--------|--------|-------------|
|         |                                                      | Exp.   | Theor. |             |
| 1       | Au <sub>25</sub> BT <sub>18</sub>                    | 6506.0 | 6528.9 | 22.9        |
| 2       | Au <sub>25</sub> Calix <sub>1</sub> BT <sub>14</sub> | 6919.1 | 6945.0 | 25.9        |
| 3       | Au <sub>25</sub> Calix <sub>1</sub> BT <sub>16</sub> | 7098.0 | 7123.1 | 25.1        |
| 4       | Au <sub>25</sub> Calix <sub>1</sub> BT <sub>18</sub> | 7274.8 | 7301.5 | 26.7        |
| 5       | Au <sub>25</sub> Calix <sub>2</sub> BT <sub>10</sub> | 7335.5 | 7361.2 | 25.7        |
| 6       | Au <sub>25</sub> Calix <sub>2</sub> BT <sub>12</sub> | 7512.8 | 7539.2 | 26.4        |
| 7       | Au <sub>25</sub> Calix <sub>2</sub> BT <sub>14</sub> | 7691.1 | 7718.2 | 27.1        |
| 8       | Au <sub>25</sub> Calix <sub>2</sub> BT <sub>16</sub> | 7868.6 | 7896.6 | 28.0        |
| 9       | Au <sub>25</sub> Calix <sub>3</sub> BT <sub>6</sub>  | 7747.8 | 7777.0 | 29.2        |
| 10      | Au <sub>25</sub> Calix <sub>3</sub> BT <sub>8</sub>  | 7925.3 | 7955.3 | 30.0        |
| 11      | Au <sub>25</sub> Calix <sub>3</sub> BT <sub>10</sub> | 8104.9 | 8134.4 | 29.5        |
| 12      | Au <sub>25</sub> Calix <sub>3</sub> BT <sub>12</sub> | 8281.1 | 8312.8 | 31.7        |
| 13      | Au <sub>25</sub> Calix <sub>3</sub> BT <sub>14</sub> | 8459.8 | 8491.2 | 31.4        |

\* Difference increases in a linear fashion indicating that the difference originates from slight inaccuracy in mass calibration. However, the peak pattern in MALDI MS closely resembles the pattern observed in ESI MS from a similar sample,<sup>1</sup> thus confirming the interpretation.

**Table S-3. Interpretations of Ligands' Binding Modes on Au<sub>25</sub>Calix<sub>0-3</sub>BT<sub>6-18</sub> Clusters**

| Composition                                          | Number of Calix |           | BT bound to Au  |
|------------------------------------------------------|-----------------|-----------|-----------------|
|                                                      | Tetradentate    | Bidentate |                 |
| Au <sub>25</sub> BT <sub>18</sub>                    | 0               | 0         | 18              |
| Au <sub>25</sub> Calix <sub>1</sub> BT <sub>14</sub> | 1               | 0         | 14              |
| Au <sub>25</sub> Calix <sub>1</sub> BT <sub>16</sub> | 0               | 1         | 16              |
| Au <sub>25</sub> Calix <sub>1</sub> BT <sub>18</sub> | 0               | 1         | 16 <sup>a</sup> |
| Au <sub>25</sub> Calix <sub>2</sub> BT <sub>10</sub> | 2               | 0         | 10              |
| Au <sub>25</sub> Calix <sub>2</sub> BT <sub>12</sub> | 1               | 1         | 12              |
| Au <sub>25</sub> Calix <sub>2</sub> BT <sub>14</sub> | 0               | 2         | 14              |
| Au <sub>25</sub> Calix <sub>2</sub> BT <sub>16</sub> | 0               | 2         | 14 <sup>a</sup> |
| Au <sub>25</sub> Calix <sub>3</sub> BT <sub>6</sub>  | 3               | 0         | 6               |
| Au <sub>25</sub> Calix <sub>3</sub> BT <sub>8</sub>  | 2               | 1         | 8               |
| Au <sub>25</sub> Calix <sub>3</sub> BT <sub>10</sub> | 1               | 2         | 10              |
| Au <sub>25</sub> Calix <sub>3</sub> BT <sub>12</sub> | 0               | 3         | 12              |
| Au <sub>25</sub> Calix <sub>3</sub> BT <sub>14</sub> | 0               | 3         | 12 <sup>a</sup> |

<sup>a</sup> Two BT are presumed to bind to Au-bound Calix with disulfide bridges.

## 6. Sticking of Clusters to TLC Plate Demonstrated

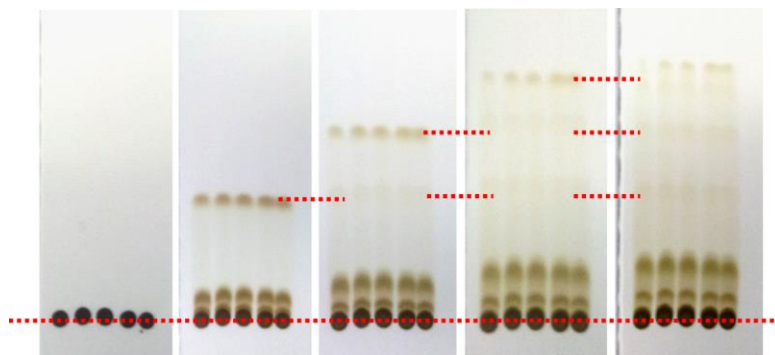

**Figure S-4.** TLC separation of  $\text{Au}_{25}\text{Calix}_{0.3}\text{BT}_{6-18}$  clusters: photographs of the same TLC plate between runs showing slight sticking of the first band. Eluent used in the separation was DCM/hexane 30:70.

## 7. Monitoring the Progress of Cluster Synthesis Using TLC

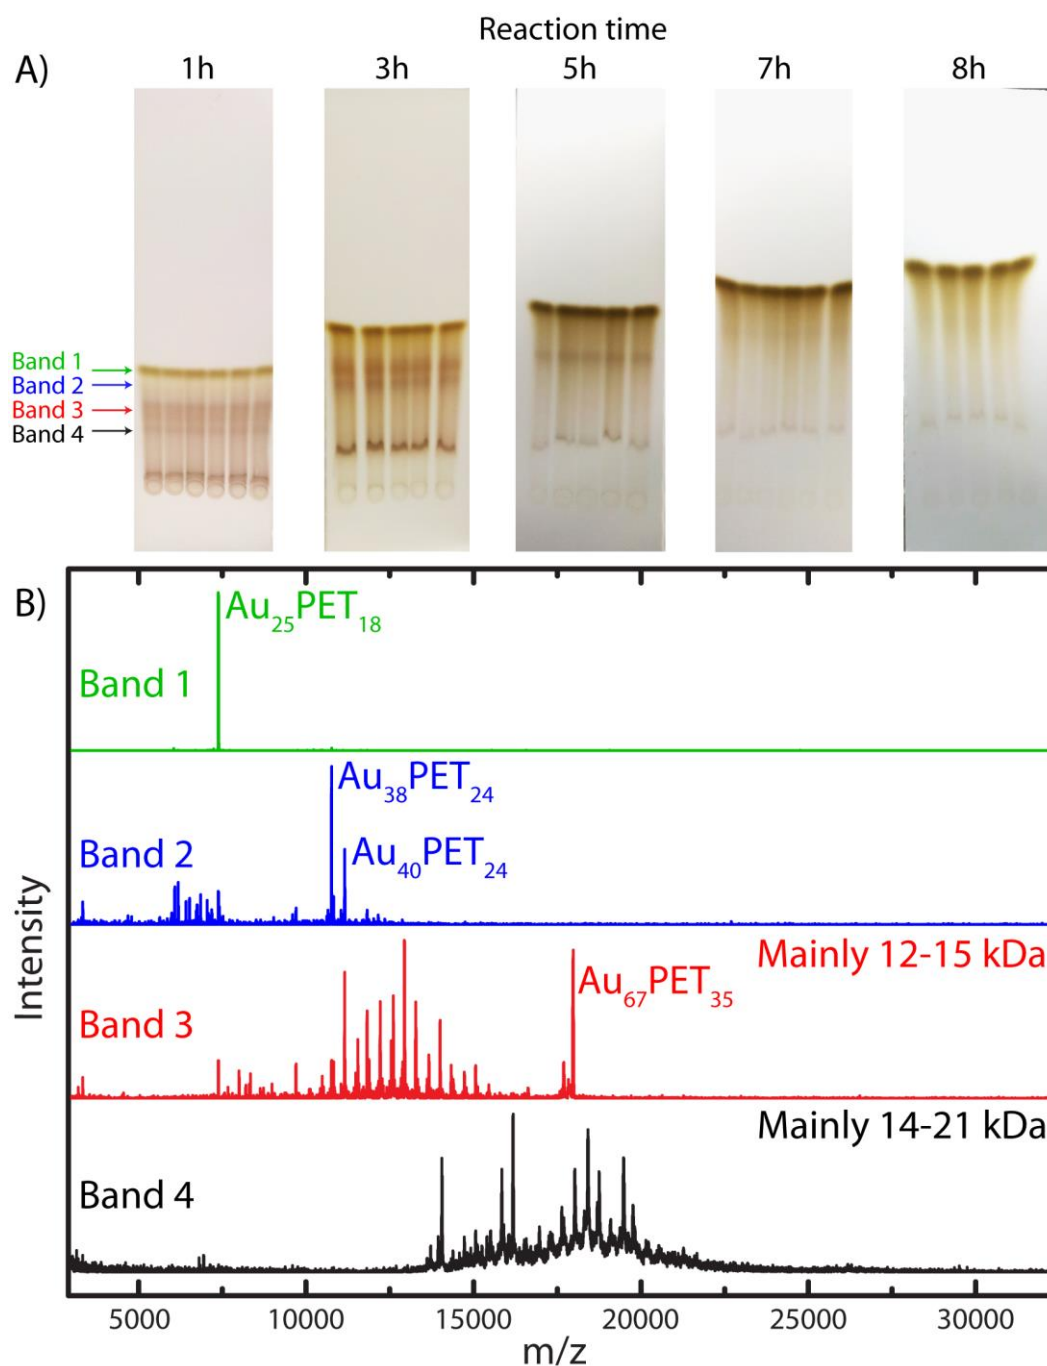

**Figure S-5.** A) Photographs of  $Au_{25}PET_{18}$  synthesis monitored by TLC (DCM/hexane 60:40). The relative amount of  $Au_{25}PET_{18}$  clusters increases with time, whereas larger clusters disappear. B) MALDI MS data of bands 1–4 after 1 h of reaction. Band 1 is composed of pure  $Au_{25}PET_{18}$  clusters (obs. 7380 m/z, theor. 7391 m/z) and band 2 is a mixture of  $Au_{38}PET_{24}$  and  $Au_{40}PET_{24}$ , which are known, stable compositions (obs. 10759 and 11152 m/z, theor. 10774 and 11168 m/z, respectively).<sup>3</sup> Bands 3 and 4 are composed of multiple larger clusters. In addition, band 3 shows a signal separate from the main pattern, which is interpreted as  $Au_{67}PET_{35}$  (obs. 17975 m/z, theor. 17999 m/z) based on previous reports.<sup>4</sup> In general, the data implies a correlation between the size and the retention factor of clusters protected with the same ligand.



## 8. References

1. Hassinen, J.; Pulkkinen, P.; Kalenius, E.; Pradeep, T.; Tenhu, H.; Häkkinen, H.; Ras, R. H. A. *J. Phys. Chem. Lett.* **2014**, *5*, 585–589.
2. Qian, H.; Jin, R. *Chem. Mater.* **2011**, *23*, 2209–2217.
3. Knoppe, S.; Dharmaratne, A. C.; Schreiner, E.; Dass, A.; Bürgi, T. *J. Am. Chem. Soc.* **2010**, *132*, 16783–16789.
4. Nimmala, P. R.; Yoon, B.; Whetten, R. L.; Landman, U.; Dass, A. *J. Phys. Chem. A* **2013**, *117*, 504–517.
